# Supplementary material for: Costless metabolic secretions as drivers of interspecies interactions in microbial ecosystems
Source: PubMed Central journal article supplement (PMC6327061; doi:10.1038/s41467-018-07946-9), 2019-01-09
Supplement: 41467_2018_7946_MOESM3_ESM.pdf [file 41467_2018_7946_MOESM3_ESM.pdf]

## **Description of Additional Supplementary Files**

File Name: Supplementary Data 1

Description: List of genome-scale metabolic models used in pairwise analyses

File Name: Supplementary Data 2

Description: List of metabolites secreted in dynamic FBA simulations, with organisms under differing substrate concentrations.
